# Supplementary material for: A benzothiazole-based dual reaction site fluorescent probe for the selective detection of hydrazine in water and live cells
Source: Royal Society of Chemistry journal article supplement (doi:10.1039/d2ob00709f), 2022-01-01
Supplement: d2ob00709f1.pdf [file d2ob00709f1.pdf]

## **Electronic Supplementary Information**

# **Benzothiazole-based dual reaction site fluorescent probe for the selective detection of hydrazine in water and live cells**

**Anwesha Maiti,<sup>a</sup> Saikat Kumar Manna,<sup>b</sup> Satyajit Halder,<sup>c</sup> Moumi Mandal,<sup>a</sup> Anirban Karak,<sup>a</sup> Dipanjan Banik,<sup>a</sup> Kuladip Jana,<sup>c</sup> and Ajit Kumar Mahapatra <sup>a\*</sup>**

<sup>a</sup> Department of Chemistry, Indian Institute of Engineering Science and Technology, Shibpur, Howrah-711103, West Bengal, India, E-mail: [akmahapatra@chem.iiests.ac.in](mailto:akmahapatra@chem.iiests.ac.in)

<sup>b</sup> Department of Chemistry, Haldia Government College, Debhog, Haldia, Purba Medinipur-721657, West Bengal, India.

<sup>c</sup> Division of Molecular Medicine, Bose Institute, P 1/12, CIT Scheme VIIM, Kolkata-700054, India.

## **Table of Contents**

1. HRMS of probe **BTC**
2. <sup>1</sup>H NMR spectrum of probe **BTC** in CDCl<sub>3</sub>
3. <sup>13</sup>C NMR spectrum of probe **BTC**
4. Comparative Fluorescence color change
5. Comparative bar diagram of change of fluorescence intensity of probe **BTC** in presence of hydrazine and different analytes.
6. The fluorescence emission spectrum of probe **BTC** in presence of hydrazine.
7. pH dependent absorbance change of probe **BTC** in presence of hydrazine.
8. Calculation of detection limit
9. kinetic study of probe **BTC**
10. Computational details
11. Calculation of fluorescence quantum yield
12. HRMS of BTC-N<sub>2</sub>H<sub>4</sub> adduct in assay
13. HRMS of reference compound R1
14. The summary table of previously reported hydrazine sensors with recent work
15. References

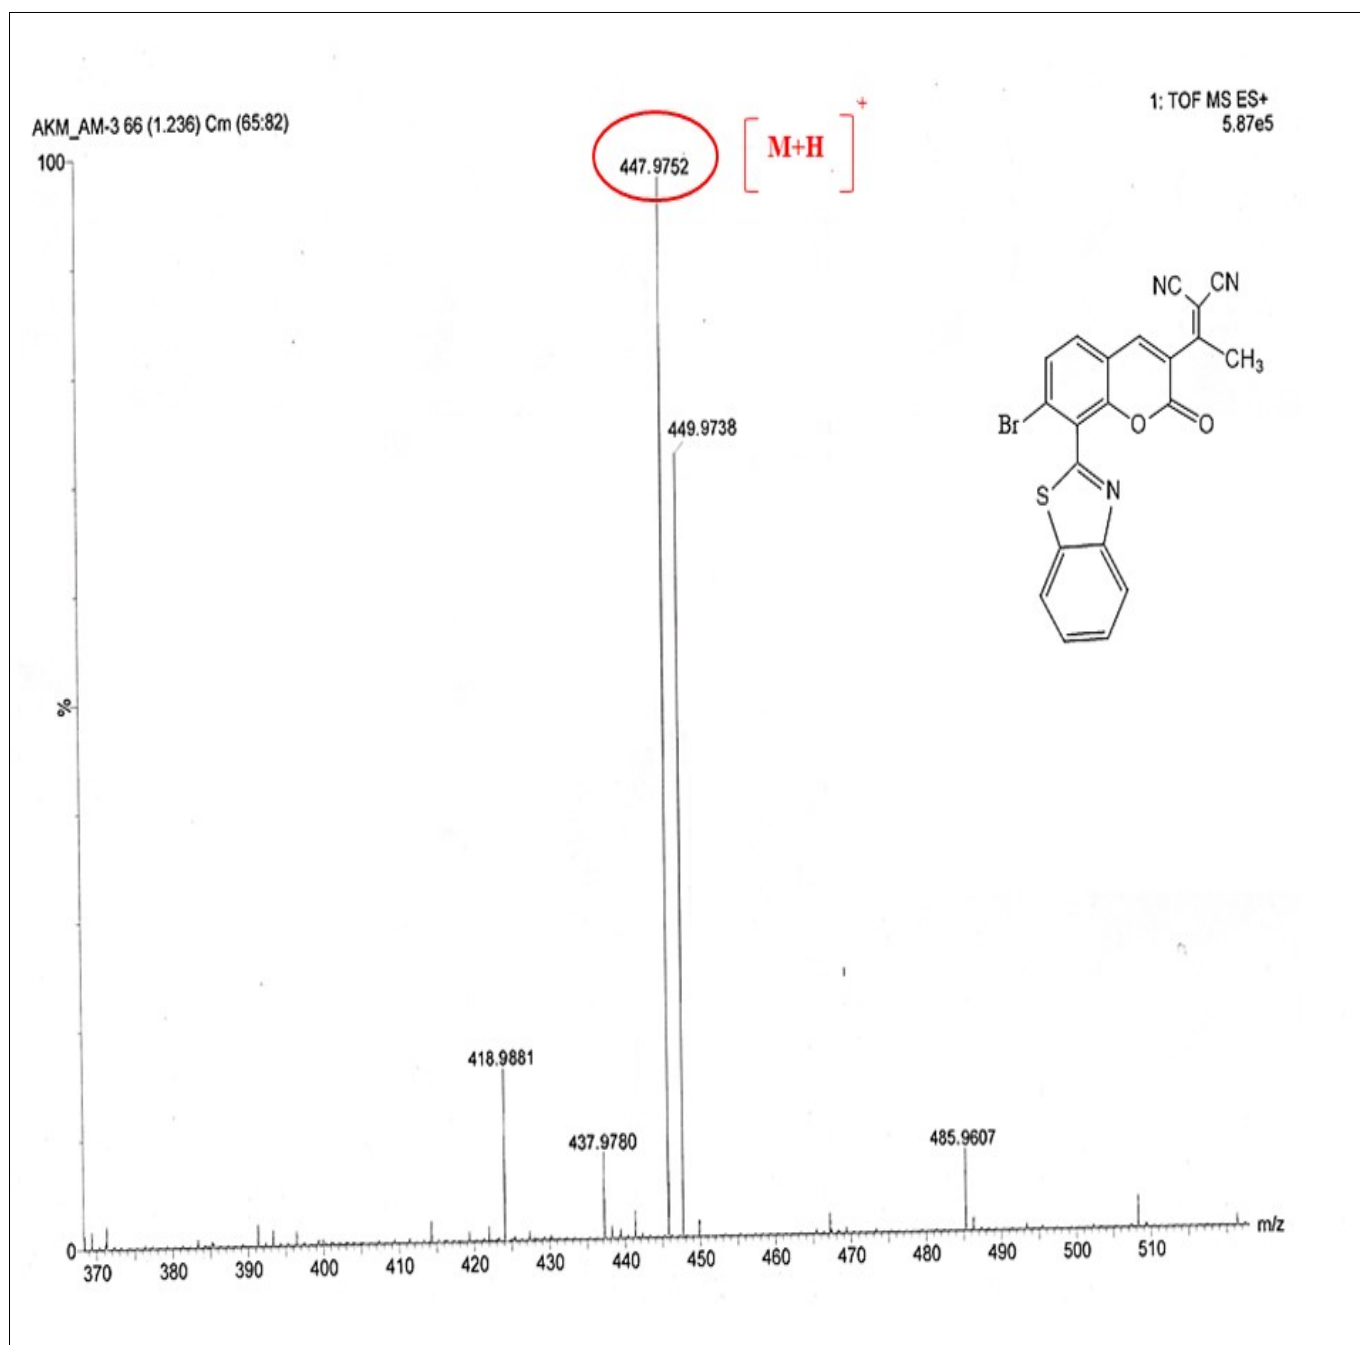

**Figure S1: HRMS spectrum of probe BTC.**

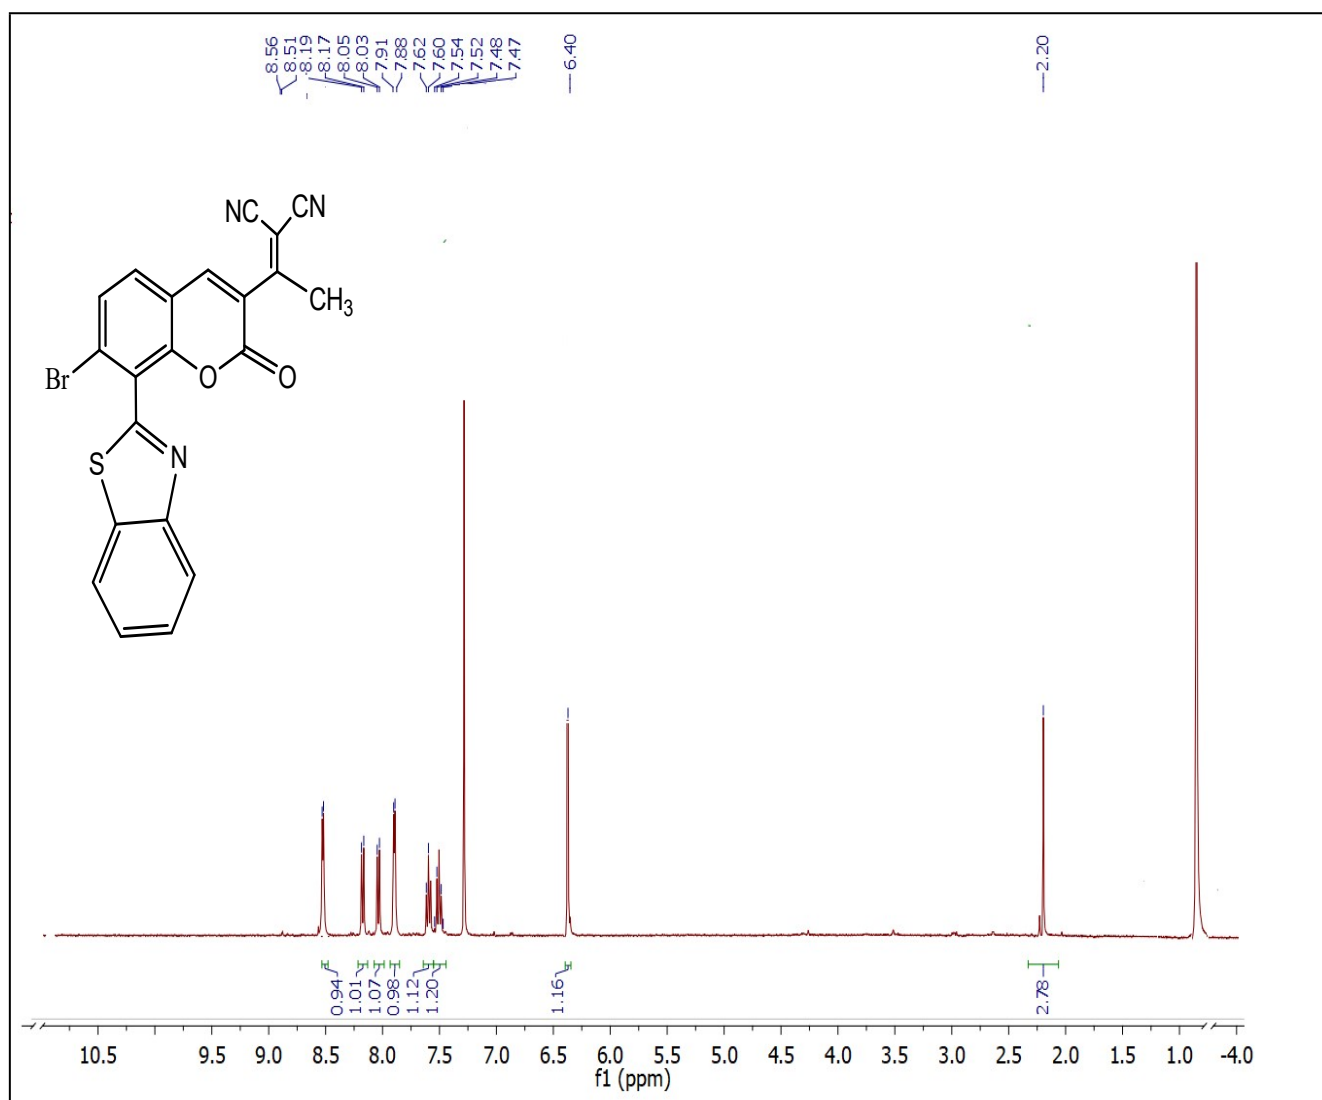

**Figure S2:** <sup>1</sup>H NMR spectrum of probe BTC in CDCl<sub>3</sub>.

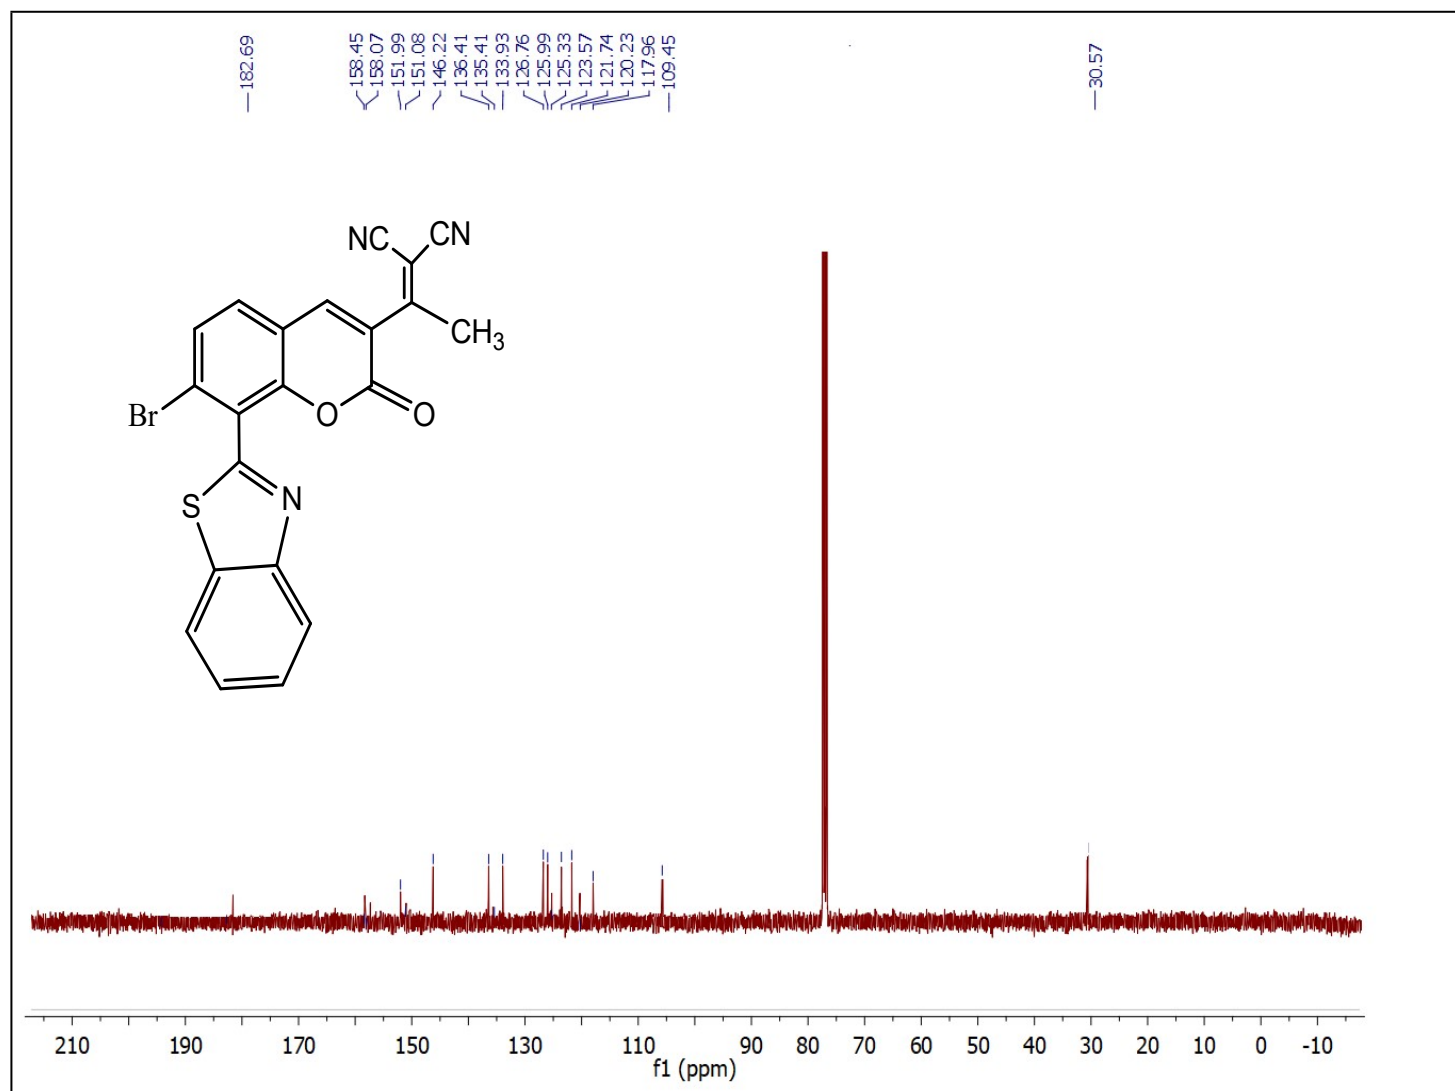

**Figure S3:**  $^{13}\text{C}$  NMR spectrum of probe BTC in  $\text{CDCl}_3$ .

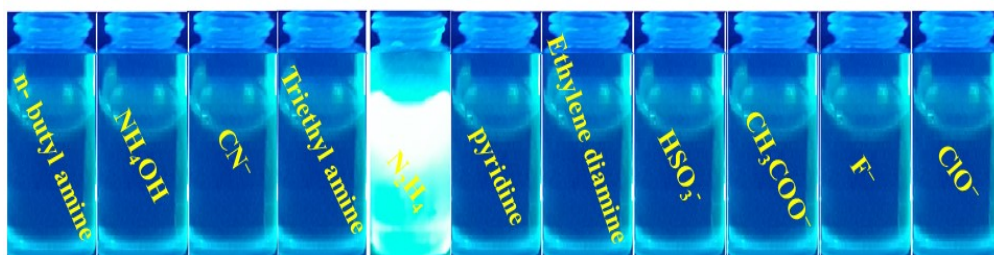

**Figure S4:** Fluorescence color changes of receptor **BTC** in aq. DMSO (DMSO: H<sub>2</sub>O = 7:3 v/v, 10mM HEPES buffer, pH = 7.4) upon addition of various analytes (1) n-butyl amine; (2) NH<sub>2</sub>OH; (3) CN<sup>-</sup> (4) triethyl amine (5) N<sub>2</sub>H<sub>4</sub>, (6) pyridine (7) ethylenediamine, (8) HSO<sub>3</sub><sup>-</sup>, (9) CH<sub>3</sub>COO<sup>-</sup> (10) F<sup>-</sup> (11) ClO<sup>-</sup>.

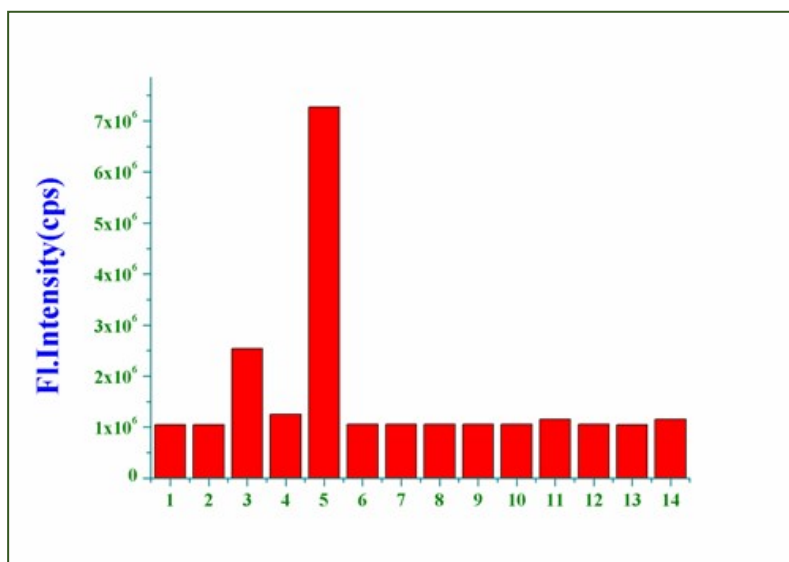

**Figure S5:** Competitive fluorescence emission spectra of compound **BTC** in the presence of different anions in aq. DMSO (DMSO /H<sub>2</sub>O) = 7:3 solution.

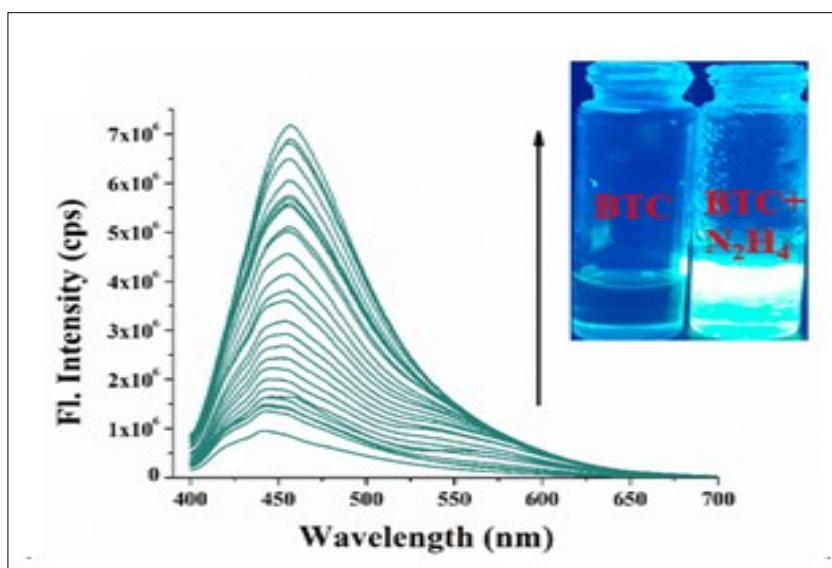

**Figure S6:** Fluorescence emission spectrum obtained of **BTC** ( $c = 4 \times 10^{-5}$  M) with  $\text{N}_2\text{H}_4$  ( $c = 4 \times 10^{-4}$  M) in aqueous DMSO (DMSO / $\text{H}_2\text{O} = 7:3$  v/v, 10 mM HEPES buffer)

**pH effect:**

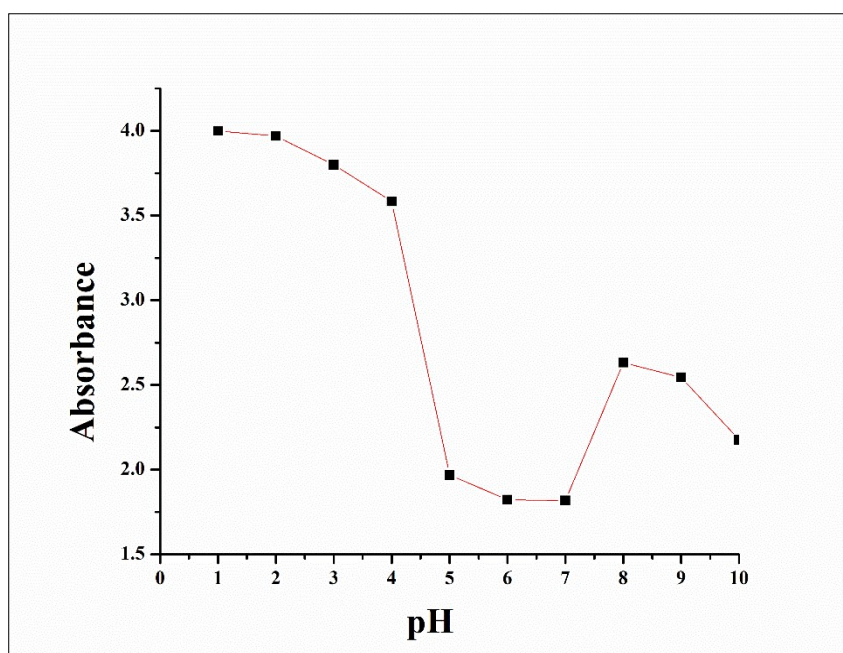

**Figure S7:** pH-dependent changes in the absorbance of probe **BTC** ( $1 \times 10^{-5}$  M) in presence of hydrazine ( $1 \times 10^{-4}$  M) in DMSO- $\text{H}_2\text{O}$  (DMSO / $\text{H}_2\text{O} = 7:3$  v/v, 10 mM HEPES buffer, pH = 7.4)

## Calculation of Detection limit:

The detection limit (DL) of **BTC** for  $\text{N}_2\text{H}_4$  were determined from the following equation:  $\text{DL} = K \cdot \text{Sb1}/S$ ; Where  $K = 2$  or  $3$  (we take  $2$  in this case);  $\text{Sb1}$  is the standard deviation of the blank solution;  $S$  is the slope of the calibration curve.

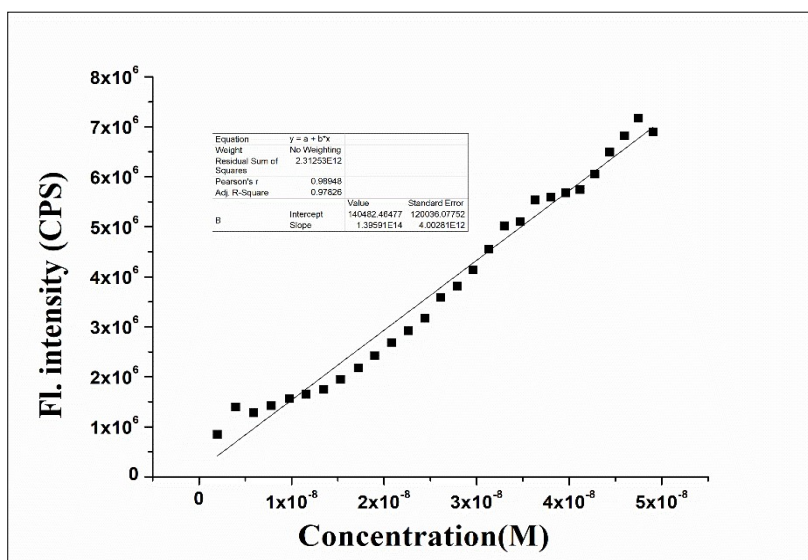

**Figure S8** : From the graph we get slope ( $S$ ) =  $1.39591 \times 10^{14}$ , Standard deviation ( $\text{Sb1} = 120036.07752$ ). Thus, using the formula, we get the detection limit =  $1.7 \text{ nM}$

## Kinetic study of probe BTC:

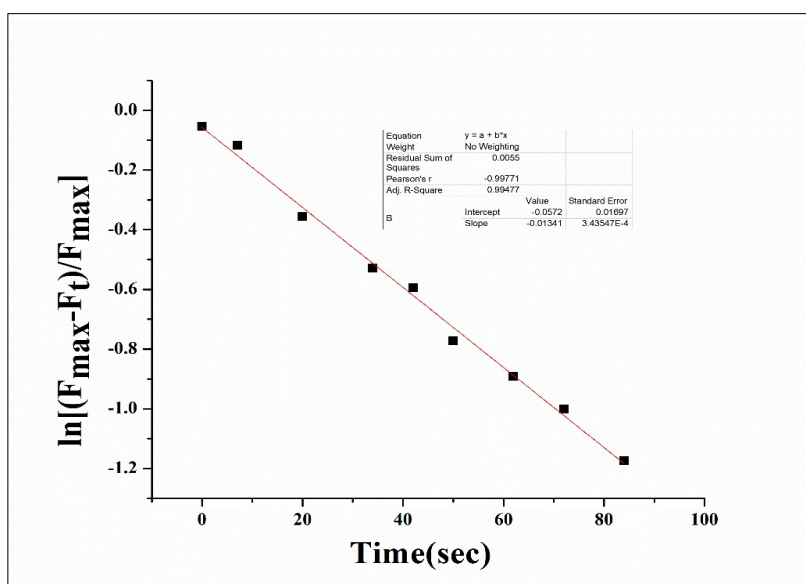

**Figure S9** : Pseudo first order kinetic diagram of probe **BTC** ( $1 \times 10^{-5} \text{ M}$ ) with  $\text{N}_2\text{H}_4$  ( $1 \times 10^{-4} \text{ M}$ ) in  $\text{DMSO-H}_2\text{O}$

## Computational details:

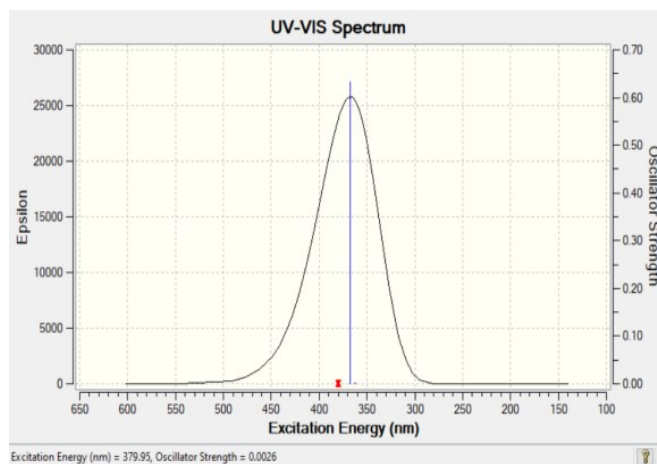

**Figure S10 :** Absorption spectra of the probe BTC

**Table S1:** The vertical main orbital transition of probe calculated by TD-DFT method

| Energy(eV) | Wavelength (nm) | Osc. strength(f) | Transition         |
|------------|-----------------|------------------|--------------------|
| 3.2632     | 379.95          | 0.0026           | <b>HOMO→LUMO</b>   |
| 3.3762     | 367.23          | 0.6333           | <b>HOMO-2→LUMO</b> |
| 3.4207     | 362.45          | 0.0015           | <b>HOMO-1→LUMO</b> |

## Calculation of fluorescence quantum yield of BTC-N<sub>2</sub>H<sub>4</sub> adduct:

Here, the fluorescence quantum yield  $\Phi$  was calculated by using the following equation:

$$\Phi_x = \Phi_s (F_x / F_s) (A_s / A_x) (\eta_x^2 / \eta_s^2)$$

Where,

X and S indicate the unknown and standard solution respectively,  $\Phi$  = quantum yield

F = Area under the emission curve, A= Absorbance at the excitation wavelength,

$\eta$  = Refractive index of solvent. Here  $\Phi$  measurements were performed using fluorescein in ethanol as standard [ $\Phi = 0.79$ ]



The fluorescence quantum yield of **BTC-N<sub>2</sub>H<sub>4</sub>** product was calculated by taking fluorescein ( $\Phi = 0.79$  in ethanol) as standard.

$\eta_s = 1.3614$  (for ethanol);  $\eta_x = 1.479$  (for DMSO)

The quantum yield of **BTC-N<sub>2</sub>H<sub>4</sub>** adduct was calculated using the above equation and the value is 0.67.

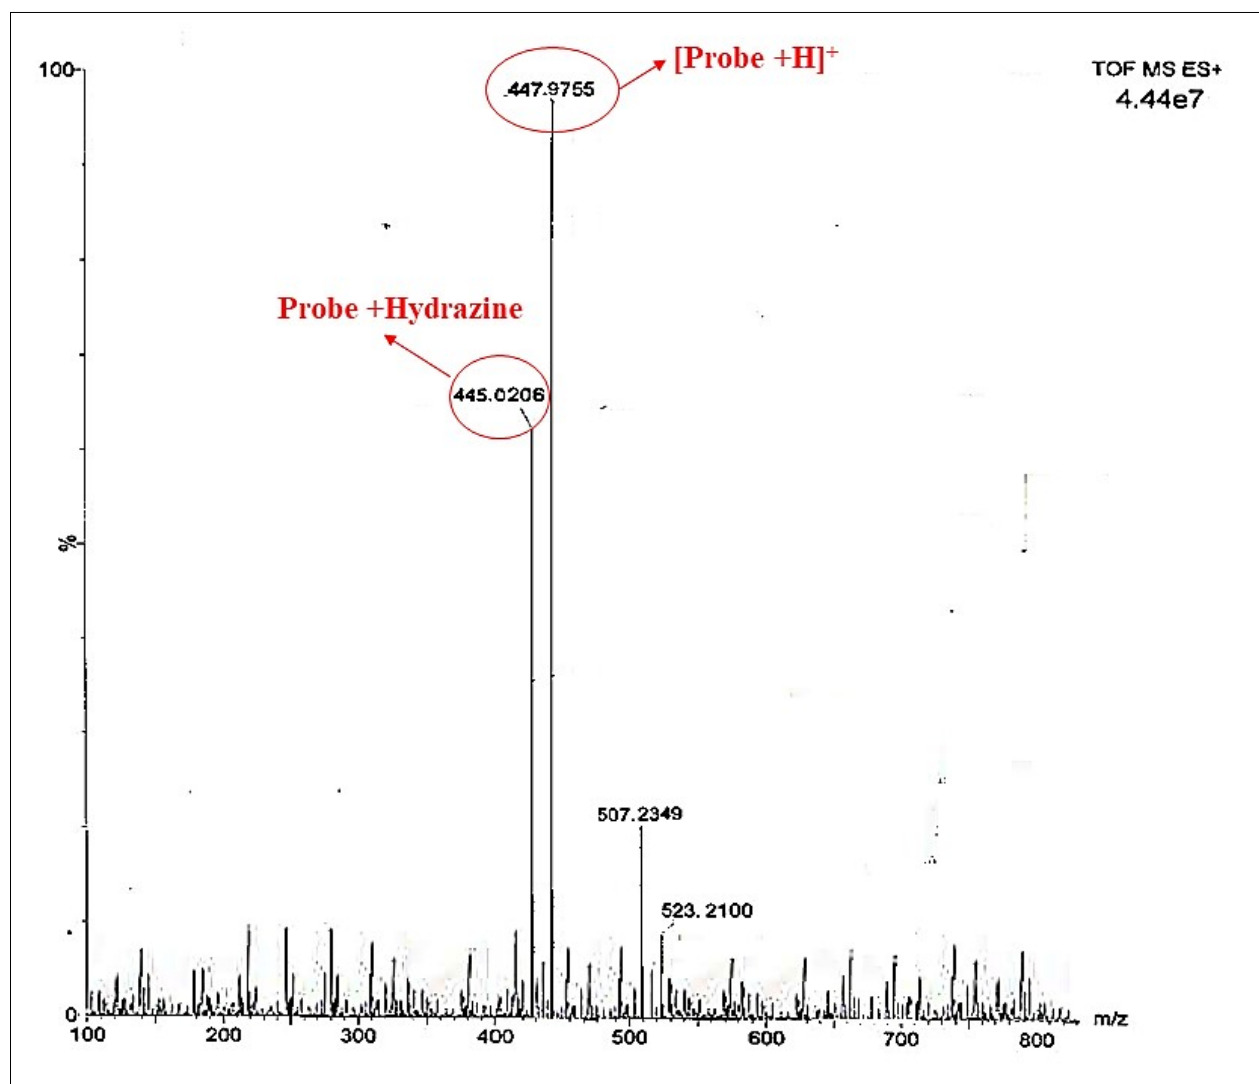

**Figure S11: HRMS of BTC-N<sub>2</sub>H<sub>4</sub> adduct in assay.**

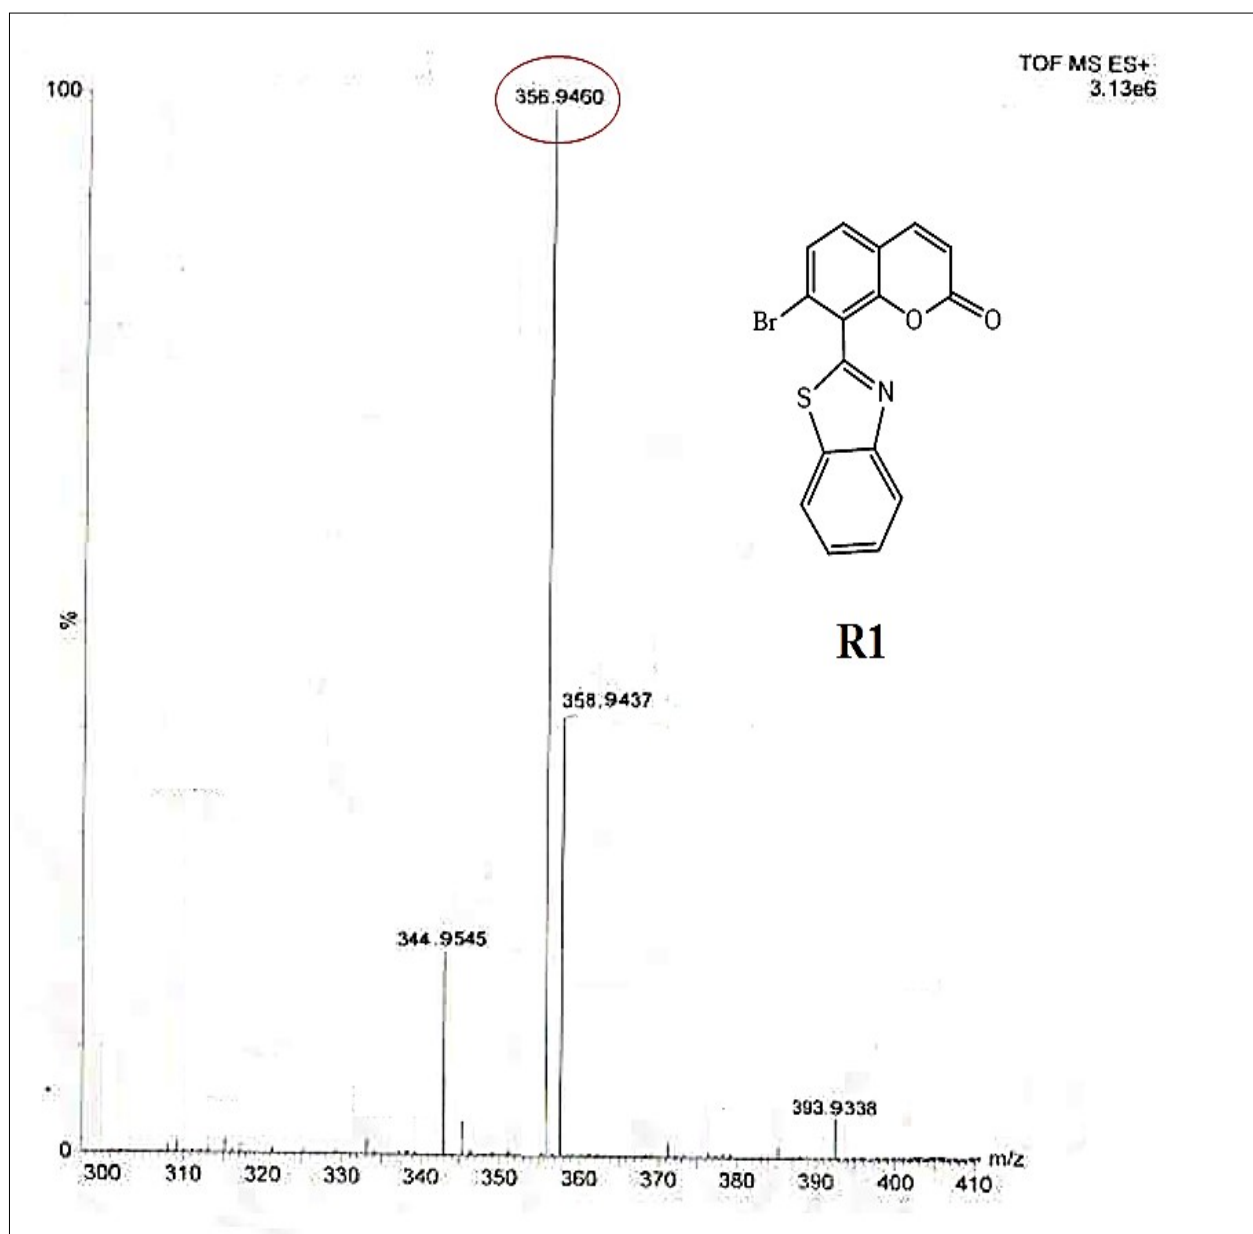

Figure S12: HRMS of reference compound R1.

Table S2: Comparison data of previously reported  $N_2H_4$  sensors with current data

| Sl. No. | Probe structure                                                                     | Excitation                                  | Emission in presence of hydrazine                               | Detection limit | Response time | Application                                             | Reference |
|---------|-------------------------------------------------------------------------------------|---------------------------------------------|-----------------------------------------------------------------|-----------------|---------------|---------------------------------------------------------|-----------|
| 1.      | 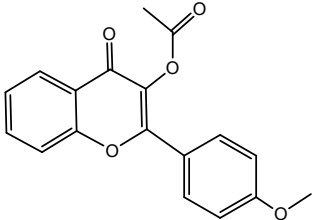   | 370 nm                                      | 415 nm <sup>2</sup> (N* form) and 540 nm <sup>2</sup> (T* form) | 10 $\mu$ M      | 60 min        | Live stem cell and <i>in vivo</i> zebrafish imaging     | [1]       |
| 2.      |   | 480 nm                                      | 542 nm <sup>2</sup>                                             | 5.4 ppb         | 10 min        | Live HeLa cell and <i>in vivo</i> zebrafish imaging     | [2]       |
| 3.      |  | 540 nm <sup>2</sup> and 730 nm <sup>2</sup> | 662 nm <sup>2</sup> to 825 nm <sup>2</sup>                      | 2.56 ppb        | 7 min         | Live cell, kidney and <i>in vivo</i> mouse body imaging | [3]       |
| 4.      |  | 300 nm                                      | 368 nm <sup>2</sup> to 458 nm <sup>2</sup>                      | 0.78 ppb        | 1 h           | Live cell imaging                                       | [4]       |
| 5.      |  | 460 nm                                      | 516 nm <sup>2</sup>                                             | 3.2 ppb         | 30s           | No application                                          | [5]       |

|     |                                                                                     |                                             |                                            |            |        |                                                             |          |
|-----|-------------------------------------------------------------------------------------|---------------------------------------------|--------------------------------------------|------------|--------|-------------------------------------------------------------|----------|
| 6.  | 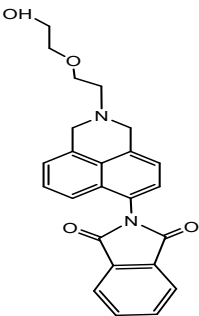   | 405 nm                                      | 467 nm <sup>2</sup> to 528 nm <sup>2</sup> | 4.2 nM     | 15 min | Live HeLa cell imaging                                      | [6]      |
| 7.  |    | 365 nm                                      | 414 nm <sup>2</sup> to 460 nm <sup>2</sup> | 0.22 ppb   | 5 min  | No application                                              | [7]      |
| 8.  |    | 510 nm                                      | 639 nm <sup>2</sup> to 564 nm <sup>2</sup> | 0.43 μM    | 20 min | Live HeLa cell imaging                                      | [8]      |
| 9.  |  | 320 nm <sup>2</sup> and 470 nm <sup>2</sup> | 435 nm <sup>2</sup> to 560 nm <sup>2</sup> | 36 nM      | 5 min  | Live cell imaging and vapor phase detection by test strips. | [9]      |
| 10. |  | 400 nm                                      | 471 nm <sup>2</sup> to 560 nm <sup>2</sup> | 0.203 2 μM | 10 min | Live cell imaging and vapor phase detection by test strips. | [10]     |
| 11. |  | 390 nm                                      | 446 nm <sup>2</sup>                        | 1.7 nM     | 1 min  | Live cell imaging and vapor phase detection by test strips. | Our Work |

## References:

- [1] B. Liu, Q. Liu, M. Shah, J. Wang, G. Zhang and Y. Pang, *Sens. Actuators, B*, 2014, **202**, 194–200.
- [2] Q. Fang, L. Yang, H. Xiong, S. Han, Y. Zhang, J. Wang, W. Chen and X. Song, *Chinese Chem. Lett.*, 2019, 2–5.
- [3] Y. Song, G. Chen, X. Han, J. You and F. Yu, *Sens. Actuators, B*, 2019, **286**, 69–76.
- [4] S. Goswami, S. Das, K. Aich, B. Pakhira, S. Panja, S.K. Mukherjee and S. Sarkar, *Org. Lett.*, 2013, **15**, 5412–5415.
- [5] S. Goswami, K. Aich, S. Das, S. Basu Roy, B. Pakhira and S. Sarkar, *RSC Adv.*, 2014, **4**, 14210–14214.
- [6] M.V. Ramakrishnam Raju, E. Chandra Prakash, H.C. Chang and H.C. Lin, *Dyes Pigm.*, 2014, **103**, 9–20.
- [7] S. Yu, S. Wang, H. Yu, Y. Feng, S. Zhang, M. Zhu, H. Yin and X. Meng, *Sens. Actuators, B*, 2015, **220**, 1338–1345.
- [8] J. Fan, W. Sun, M. Hu, J. Cao, G. Cheng, H. Dong, K. Song, Y. Liu, S. Sun and X. Peng, *Chem. Commun.*, 2012, **48**, 8117–8119.
- [9] W. Zhang, F. Huo, T. Liu and C. Yin, *J. Mater. Chem. B*, 2018, **6**, 8085.
- [10] X. Shi, C. Yin, Y. Zhang, Y. Wen and F. Huo, *Sens. Actuators, B*, 2019, **285**, 368–374.
